# Supplementary material
Source: PubMed Central journal article supplement (PMC2911319)
Supplement: supp_M110.108696_jbc.M110.108696-1.pdf [file supp_M110.108696_jbc.M110.108696-1.pdf]

**ROLES OF PLATELET STIM1 AND ORAI1 IN GLYCOPROTEIN VI- AND THROMBIN-DEPENDENT PROCOAGULANT ACTIVITY AND THROMBUS FORMATION\*<sup>S</sup>**

**Karen Gilio<sup>‡1</sup>, Roger van Kruchten<sup>‡1</sup>, Attila Braun<sup>§1</sup>, Alejandro Berna-Erro<sup>§</sup>, Marion A. H. Feijge<sup>‡</sup>, David Stegner<sup>§</sup>, Paola E. J. van der Meijden<sup>‡</sup>, Marijke J. E. Kuijpers<sup>‡</sup>, David Varga-Szabo<sup>§</sup>, Johan W. M. Heemskerk<sup>‡1</sup>, Bernhard Nieswandt<sup>§1</sup>**

From the <sup>‡</sup>Department of Biochemistry, Cardiovascular Research Institute Maastricht (CARIM), Maastricht University, Maastricht, The Netherlands, and the <sup>§</sup>Rudolf Virchow Center for Experimental Medicine & University Clinic, University of Würzburg, Würzburg, Germany

Correspondence to: dr. J.W.M. Heemskerk: Dept. of Biochemistry, CARIM, Maastricht University, P. O. Box 616, 6200 MD Maastricht, The Netherlands. Tel.: 31-43-3881671; Fax: 31-43-3884159; E-mail: [jwm.heemskerk@bioch.unimaas.nl](mailto:jwm.heemskerk@bioch.unimaas.nl); dr. B. Nieswandt: Vascular Biology, Rudolf Virchow Centre for Experimental Biomedicine, Versbacher Str. 9, D-97078 Würzburg, Germany. Tel. 49-931-20144060; Fax: 49-931-20148068; E-mail: [bernhard.nieswandt@virchow.uni-wuerzburg.de](mailto:bernhard.nieswandt@virchow.uni-wuerzburg.de)

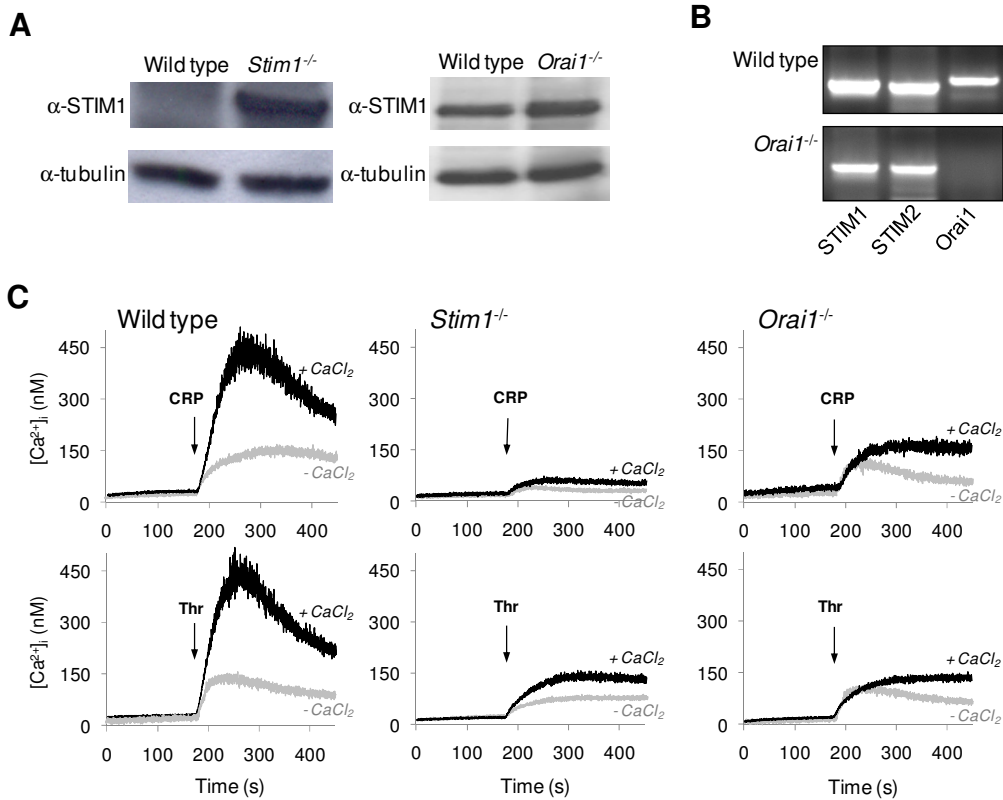

**SUPPLEMENTAL FIGURE 1. Defective GPVI- and thrombin-receptor induced  $Ca^{2+}$  signaling in platelets deficient in STIM1 or Orai1.** *A*, Expression profiles of STIM1 protein in platelets from wild type (WT) and chimeric *Stim1*<sup>-/-</sup> or *Orai1*<sup>-/-</sup> mice. Western blots are given after probing with anti-STIM1 mAb; blots were reprobed with anti-tubulin mAb as control. *B*, RT-PCR indicating absence of *Orai1* transcript but presence of *Stim1* and *Stim2* transcripts in platelets from chimeric *Orai1*<sup>-/-</sup> mice. *C*, impaired  $Ca^{2+}$  responses of *Stim1*<sup>-/-</sup> and *Orai1*<sup>-/-</sup> platelets especially in the presence of  $CaCl_2$ . Fura-2-loaded platelets were stimulated with 10  $\mu$ g/ml CRP (*upper panels*) or 0.9 nM thrombin (*Thr, lower panels*) in the presence or absence of 1 mM  $CaCl_2$ , as indicated. Shown are representative traces of rises in  $[Ca^{2+}]_i$  ( $n = 3-5$ ).
